# Supplementary material
Source: PubMed Central journal article supplement (PMC9294212)
Supplement: mmc1.pdf [file mmc1.pdf]

**iScience, Volume 25**

**Supplemental information**

**Immune response to SARS-CoV-2 in severe  
disease and long COVID-19**

**Tomonari Sumi and Kouji Harada**

## Supplemental Information for

# Immune response to SARS-CoV-2 in severe disease and long COVID-19

Tomonari Sumi<sup>1,2</sup> and Kouji Harada<sup>3,4</sup>

<sup>1</sup> Research Institute for Interdisciplinary Science, Okayama University, 3-1-1 Tsushima-Naka, Kita-ku, Okayama 700-8530, Japan

<sup>2</sup> Department of Chemistry, Faculty of Science, Okayama University, 3-1-1 Tsushima-Naka, Kita-ku, Okayama 700-8530, Japan

<sup>3</sup> Department of Computer Science and Engineering, Toyohashi University of Technology, Tempaku-cho, Toyohashi 441-8580, Japan

<sup>4</sup> Center for IT-Based Education, Toyohashi University of Technology, Tempaku-cho, Toyohashi, Aichi, 441-8580, Japan

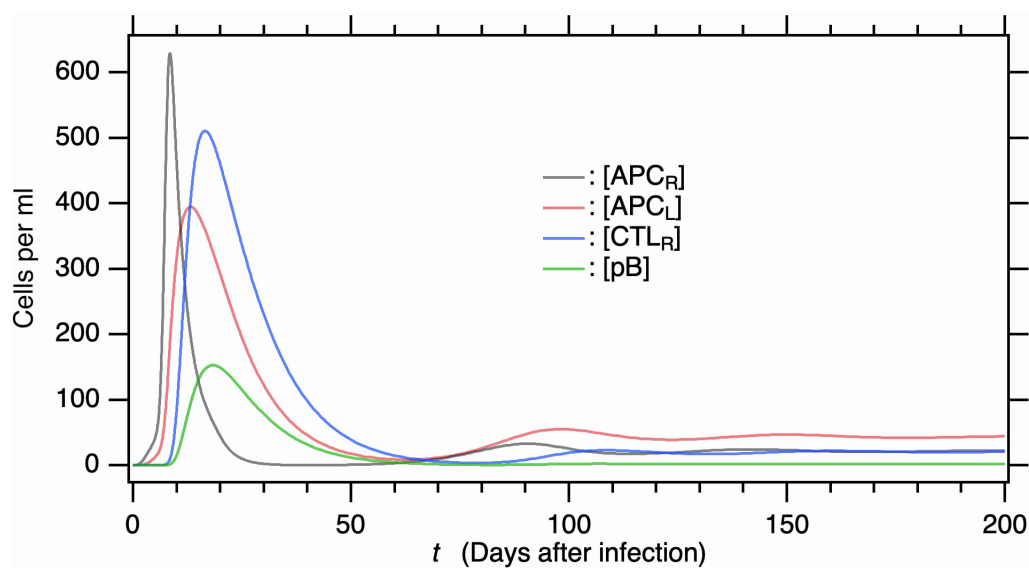

Figure S1. Long-term behavior of immune cell concentrations displayed in Figure 2d.

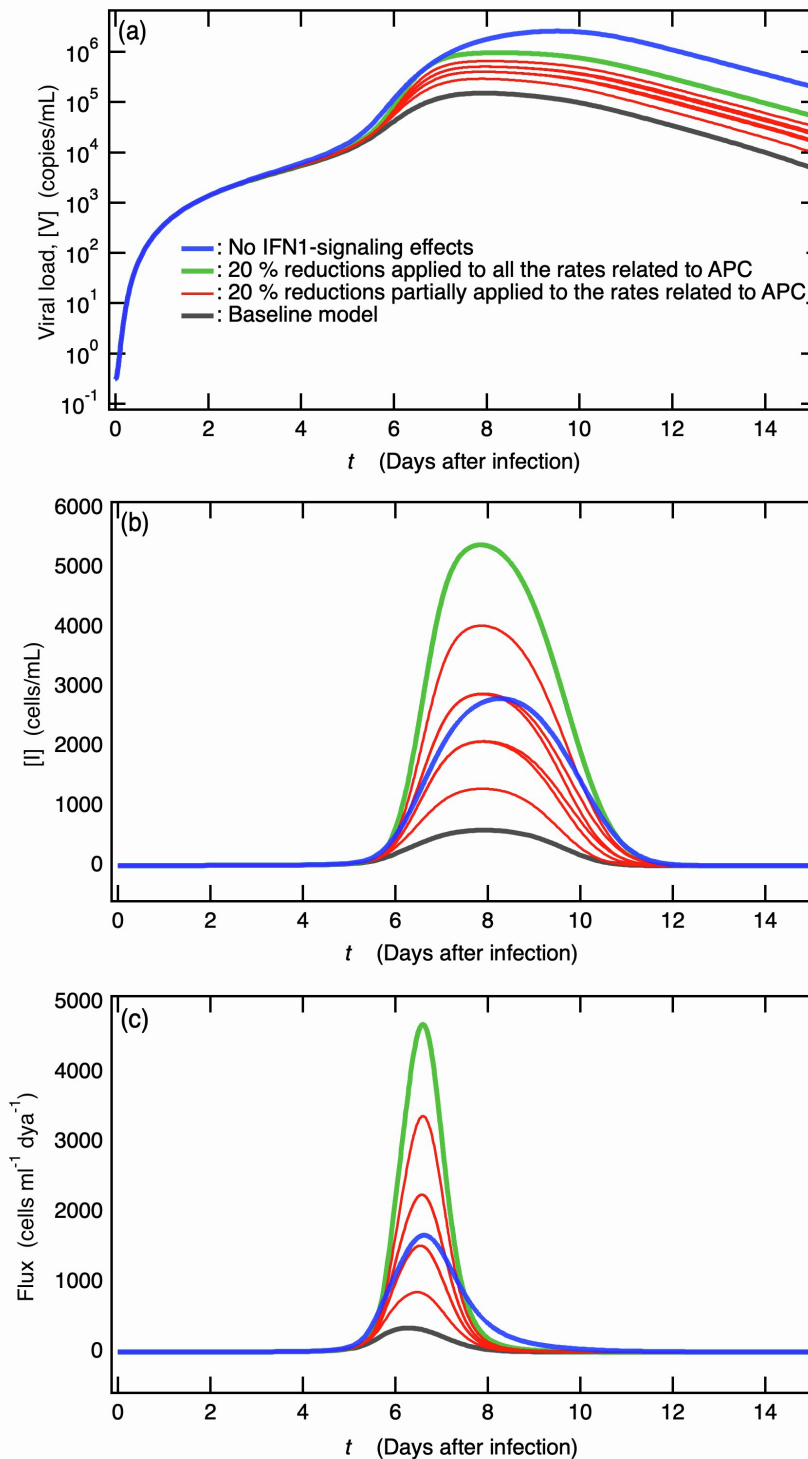

**Figure S2. Twenty percent reductions in each rate related to the APC functions result in a large increase in viral infection flux overall, related to information for Figure 4.** Time courses of (a) viral load [V], (b) infected cells [I], and (c) the flux of viral infection. In all the figures, the baseline model, 80% APC activity (Model 2), no IFN1 signaling (Model 4), and seven models where 20% reductions in each rate related to APC activities are additively considered from the top to bottom of STAR★Methods Table 4, Model 2, are shown. In (b) and (c), the [I] and viral infection flux for the last two of APC activities reduced models (shown as red curves) become higher than the model without IFN1-signaling effects (blue curve), when 20% reductions in each rate related to APC activities are additively taken into considerations one-by-one.

## Linear stability analysis based on the eigenvalues of the Jacobian matrix

**Table S1. The steady state for the baseline model (STAR★Methods Table 1) with zero value of [V], related to information for Figures 2 and 5.** The fixed point for  $[V] = 0$  is unstable in the baseline model.

| Type of eigenvalue | Number |
|--------------------|--------|
| Purely real        | 16     |
| Purely imaginary   | 0      |
| Complex            | 0      |
| Zero value         | 0      |
| Positive real part | 1      |
| Negative real part | 15     |

**Table S2. Parameter dependent steady state stability for  $[V] = 0$ , related to information for Figures 2 and 5.** The viral infection rate  $\pi_I$  and viral production rate  $\pi_V$  are reduced from the baseline model (STAR★Methods Table 1,  $\pi_I = 2.0 \times 10^{-6} \text{ day}^{-1} \text{ ml copies}^{-1}$ ,  $\pi_V = 700 \text{ day}^{-1} \text{ copies cells}^{-1}$ ).

| Varying viral infection rate<br>$\pi_I$ ( $\text{day}^{-1} \text{ ml copies}^{-1}$ ) | Varying production rate of virus<br>$\pi_V$ ( $\text{day}^{-1} \text{ copies cells}^{-1}$ ) | Stability of the steady state<br>for $[V] = 0$ |
|--------------------------------------------------------------------------------------|---------------------------------------------------------------------------------------------|------------------------------------------------|
| $2.0 \times 10^{-6} \times 0.1$                                                      | $700 \times 0.1$                                                                            | Unstable                                       |
| $2.0 \times 10^{-6} \times 0.01$                                                     | $700 \times 0.01$                                                                           | Unstable                                       |
| $2.0 \times 10^{-6} \times 0.001$                                                    | $700 \times 0.001$                                                                          | Stable                                         |

**Table S3. The steady state for the baseline model with a finite value of [V], related to information for Figures 2 and 5.** The steady state for the finite value of [V] is asymptotically stable.

| Type of eigenvalue | Number |
|--------------------|--------|
| Purely real        | 10     |
| Purely imaginary   | 0      |
| Complex            | 6      |
| Zero value         | 0      |
| Positive real part | 0      |
| Negative real part | 16     |

## Sensitivity analysis for the baseline model

**Table S4. Sensitivity analysis for the steady state [I] and [V] in the baseline model, related to information for Figure 5.**

| Model Parameters                 | Scaled sensitivity to [I] | Scaled sensitivity to [V] |
|----------------------------------|---------------------------|---------------------------|
| (H production).v                 | 0.245316                  | 0.146659                  |
| (DC production).v                | -1.83462                  | -2.83242                  |
| (H death).k1                     | -0.245313                 | -0.146656                 |
| (DC death).k1                    | 0.641779                  | 0.990827                  |
| (Virus infection).pi_I           | 0.245315                  | 0.146658                  |
| (Virus infection).beta_I         | -0.245105                 | -0.146531                 |
| (APC_R production).pi_APC        | <b>-0.641772</b>          | <b>-0.990816</b>          |
| (APC_R production).alpha_recruit | -0.151991                 | -0.234655                 |
| (APC_R production).alpha_apc     | <b>-0.638908</b>          | <b>-0.986394</b>          |
| (Virus production).pi_V          | -0.755115                 | 0.147711                  |
| (Virus production).beta_V        | 0.178834                  | -0.0349818                |
| (Virus death).k1                 | 0.507642                  | -0.0992994                |
| (IFN1 production by I).sigma     | -0.0001767                | -0.0009314                |
| (IFN1 production by APC_R).sigma | -0.0775899                | -0.408968                 |
| (I death).k1                     | -0.0056177                | -0.0033696                |
| (APC_R death).k1                 | 0.673624                  | 0.932026                  |
| (APC_R migration).k1             | <b>-0.596024</b>          | <b>-0.523046</b>          |
| (APC_L death).k1                 | 1.94329                   | 2.38712                   |
| (CD4+T0 death).k1                | 0.908674                  | 1.11621                   |
| (Th1 production).pi_th1          | -0.199843                 | -0.112213                 |
| (Th1 production).alpha_th1       | -0.0060149                | -0.0033775                |
| (Th1 death).k1                   | 0.212027                  | 0.127181                  |
| (CD4+T0 production).v            | -1.03459                  | -1.27088                  |
| (CD8+T0 production).v            | -0.239081                 | -0.143407                 |
| (CD8+T0 death).k1                | 0.212027                  | 0.127181                  |
| (CTL_L production).pi_CTL        | -0.212025                 | -0.127179                 |
| (CTL_L death).k1                 | 0.0142959                 | 0.00857513                |
| (CTL_L migration).mu_CTL         | -0.0142958                | -0.008575                 |
| (CTL_L migration).alpha_recruit  | -0.0033857                | -0.0020308                |
| (CTL_R death).k1                 | 0.239083                  | 0.14341                   |
| (Kill infedted cells).k_I        | -0.239081                 | -0.143407                 |
| (Tfh production).pi_tfh          | <b>-0.70882</b>           | <b>-1.00398</b>           |
| (Tfh production).alpha_tfh       | -0.095209                 | -0.134855                 |
| (Tfh death).k1                   | 0.822575                  | 1.14372                   |
| (B0 production).v                | -0.82335                  | -1.14479                  |
| (B0 death).k1                    | 0.822575                  | 1.14372                   |

|                                    |           |            |
|------------------------------------|-----------|------------|
| (pB production).pi_pb              | -0.822566 | -1.1437    |
| (pB death).k1                      | 0.823359  | 1.14481    |
| (Ig production).pi_ig              | -0.82335  | -1.14479   |
| (Ig degradation).k1                | 0.750093  | 1.04294    |
| (IFN1 degradation).k1              | 0.0777663 | 0.409898   |
| (Ig-binding to virus).ksi_ig       | 0.0732655 | 0.101869   |
| (Virus neutralized by Ig).gamma_ig | 0.0606631 | -0.0118664 |
